# Supplementary material for: Different cell behaviors induced by stereochemistry on polypeptide brush grafted surfaces
Source: Royal Society of Chemistry journal article supplement (doi:10.1039/c6qm00200e), 2016-11-15
Supplement: c6qm00200e1.pdf [file c6qm00200e1.pdf]

Electronic Supplementary Information (ESI) for

**Different cell behaviors induced by stereochemistry  
on polypeptide brush grafted surfaces**

Yinan Ma,<sup>a,c</sup> Yong Shen<sup>b\*</sup> and Zhibo Li<sup>a,c\*</sup>

<sup>a</sup>School of Polymer Science and Engineering, Qingdao University of Science and Technology, Qingdao 266042, China. Email: zbli@qust.edu.cn

<sup>b</sup>College of Chemical Engineering, Qingdao University of Science and Technology, Qingdao 266042, China. Email: shenyong@iccas.ac.cn

<sup>c</sup>Laboratory of Polymer Physics and Chemistry, Institute of Chemistry, Chinese Academy of Sciences, Beijing 100190, China.

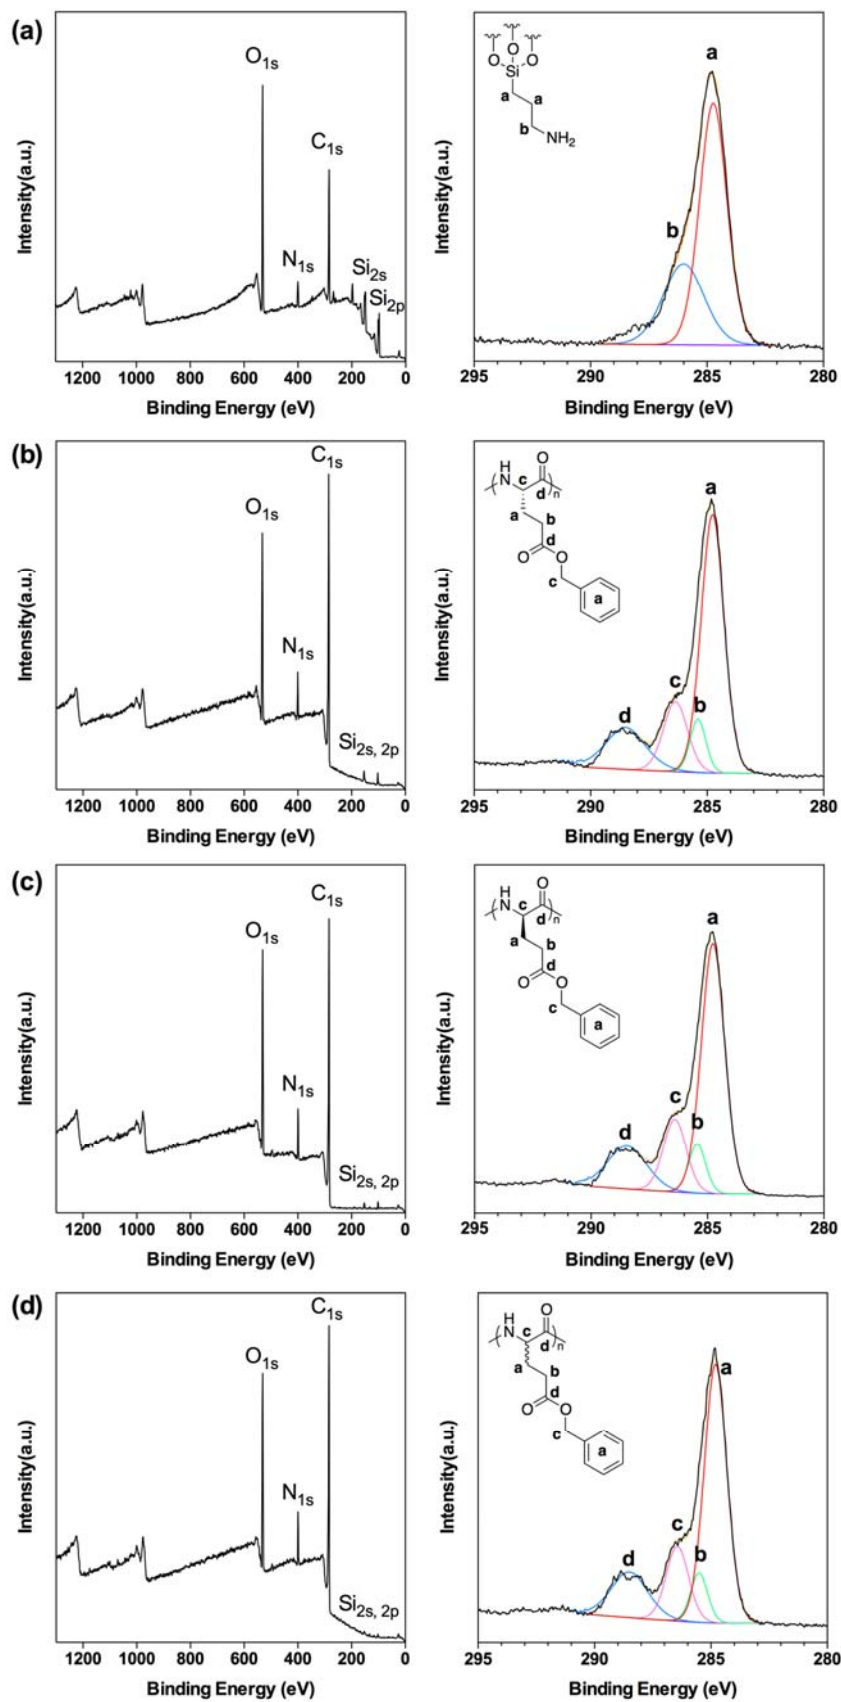

**Figure S1.** XPS survey spectra and  $C_{1s}$  high-resolution scans of (a) APTES, (b) PBLG, (c) PBDG and (d) PBracG-grafted silicon wafers.

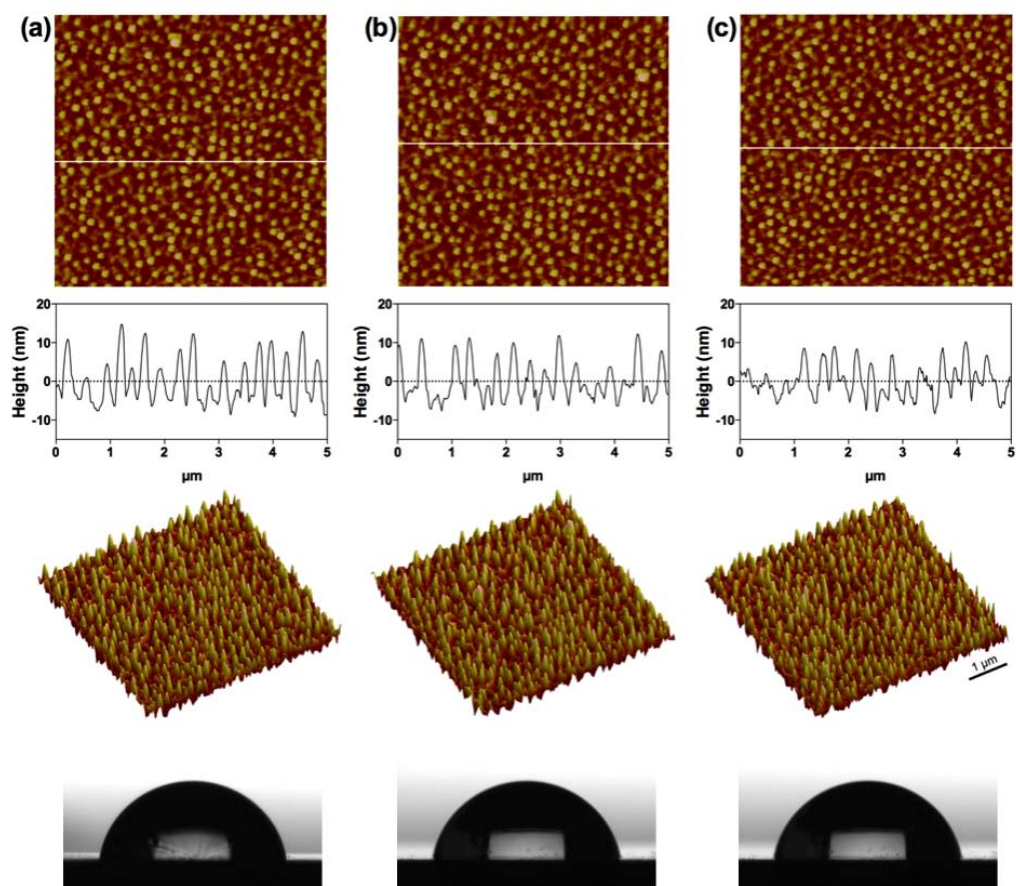

**Figure S2.** Topography of polypeptide-grafted silicon wafers by AFM: (a) PBLG, (b) PBDG, and (c) PBracG. Top panel: 2D images ( $5 \times 5 \mu\text{m}$ ,  $Z = 35 \text{ nm}$ ) and corresponding cross sectional profiles. Bottom panel: 3D images and water contact angle (WCA) measurements.
